# Supplementary material for: Explicit modelling of SOA formation from α-pinene photooxidation: sensitivity to vapour pressure estimation
Source: Copernicus journal article supplement (doi:10.5194/acp-11-6895-2011), 2011-07-18
Supplement: Supplementary file 1 [file acp-11-6895-2011-supplement.pdf]

# Supplementary material

## Explicit modelling of SOA formation from $\alpha$ -pinene photooxidation : sensitivity to vapour pressure estimation

R. Valorso<sup>1</sup>, B. Aumont<sup>1</sup>, M. Camredon<sup>1</sup>, T. Raventos-Duran<sup>1</sup>, C. Mouchel-Vallon<sup>1</sup>, N. L. Ng<sup>2</sup>, J. H. Seinfeld<sup>3</sup>, J. Lee-Taylor<sup>4</sup> and S. Madronich<sup>4</sup>

1 : LISA, UMR CNRS/INSU 7583, Université Paris Est Créteil et Université Paris Diderot, Institut Pierre Simon Laplace, 94010 Créteil France

2 : Aerodyne Research, Inc. Billerica, MA 01821, USA

3 : California Institute of Technology, Pasadena, CA 91125, USA

4 : Atmospheric Chemistry Division, NCAR, Boulder, Colorado, USA

- Figure S1 : Time evolution of  $\alpha$ -pinene/ $O_3$ / $NO_x$  for the low, intermediate and high- $NO_x$  experiments.
- Figure S2 : The extra OH source issue in the high- $NO_x$  experiment.
- Figure S3 : Contribution of the top 10, top 100 and top 1000 organic species to the total simulated SOA mass for the intermediate- $NO_x$  experiment and for the high- $NO_x$  experiment obtained with JR/MY, SIM and NAN/NAN.
- Figure S4 : Comparisons of the ranks of the simulated top 100 organic species between the various methods in the intermediate and high- $NO_x$  experiments.
- Figure S5 : Comparisons of observed and simulated SOA in the low and intermediate- $NO_x$  experiments with NAN-MY vapour pressures.
- Table S1 : Top 10 species in simulated SOA with SIM in the intermediate  $NO_x$  experiment, with their rank and contribution to the total simulated SOA mass.
- Table S2 : Top 10 species in simulated SOA with SIM in the high  $NO_x$  experiment, with their rank and contribution to the total simulated SOA mass.
- References.

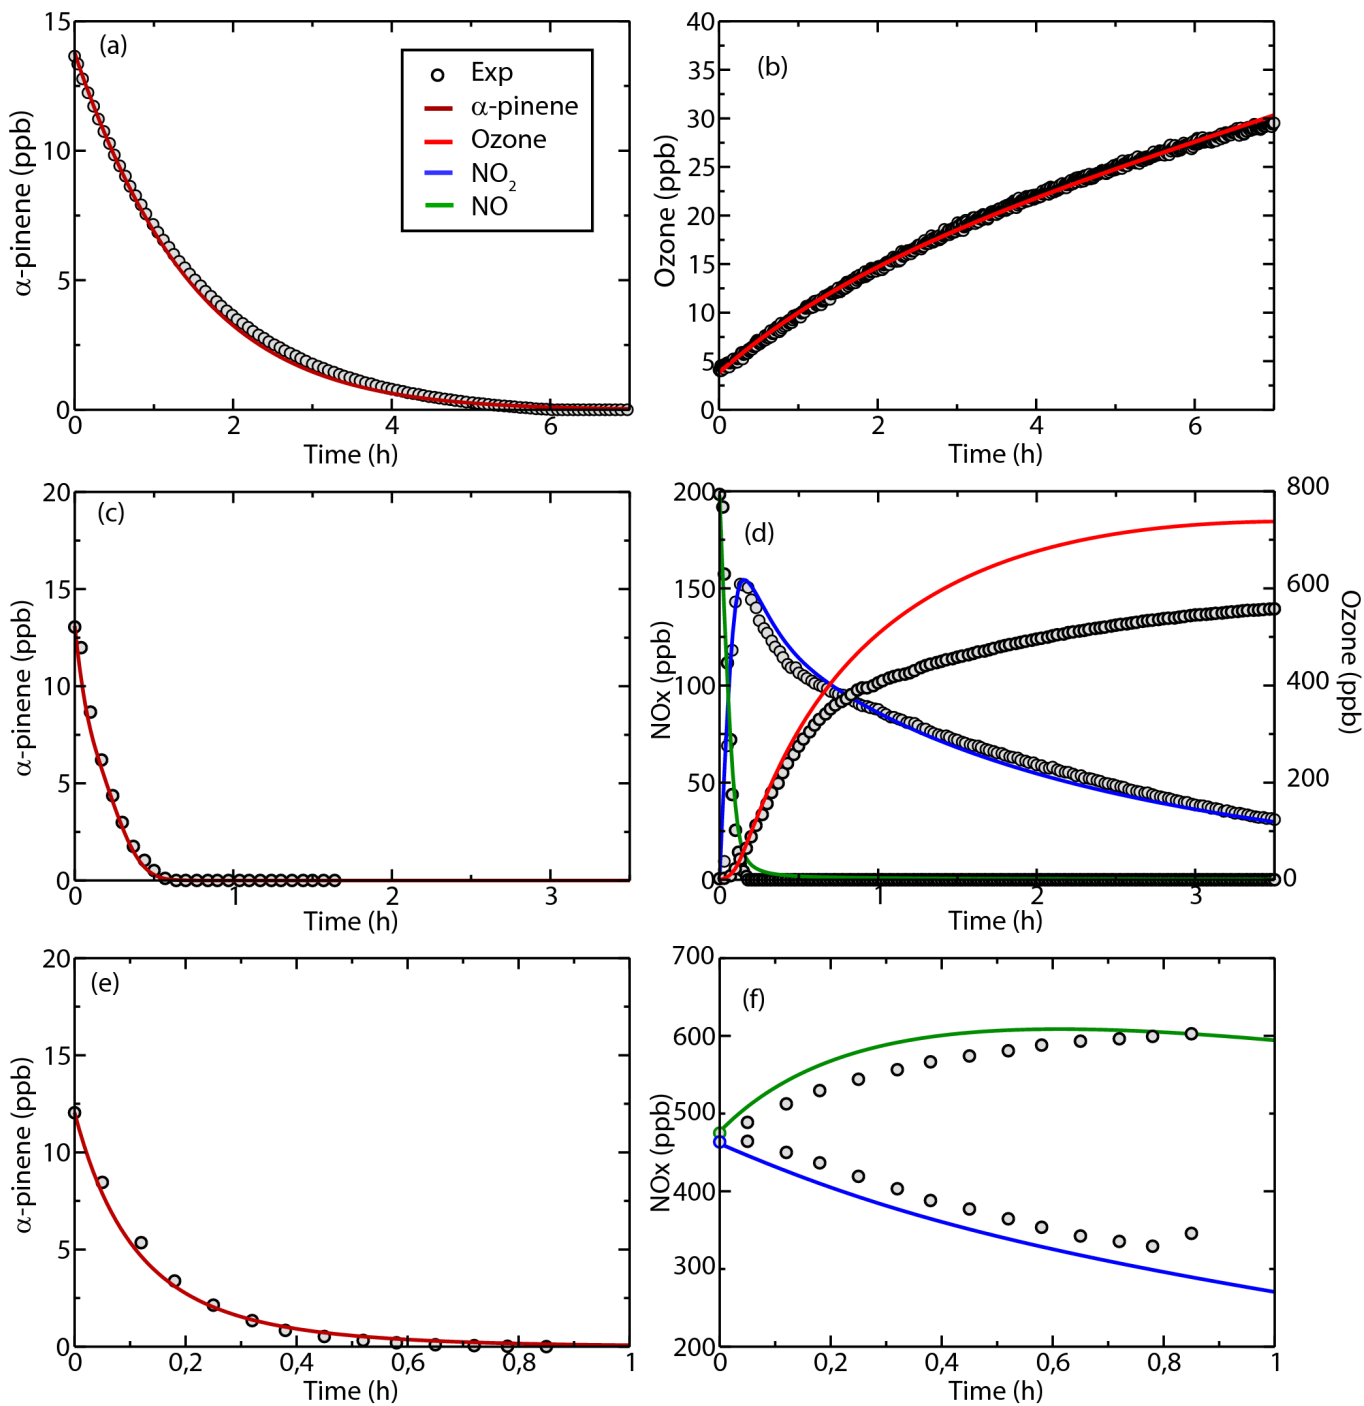

Figure S 1 – Time evolution of  $\alpha$ -pinene/O<sub>3</sub>/NO<sub>x</sub> for (a-b) the low-, (c-d) intermediate- and (e-f) high-NO<sub>x</sub> experiments. Dots and lines represent measured and modelled compounds respectively. Modelled results are obtained with JR/MY scheme. Similar results are observed with NAN/NAN and SIM and are therefore not represented.

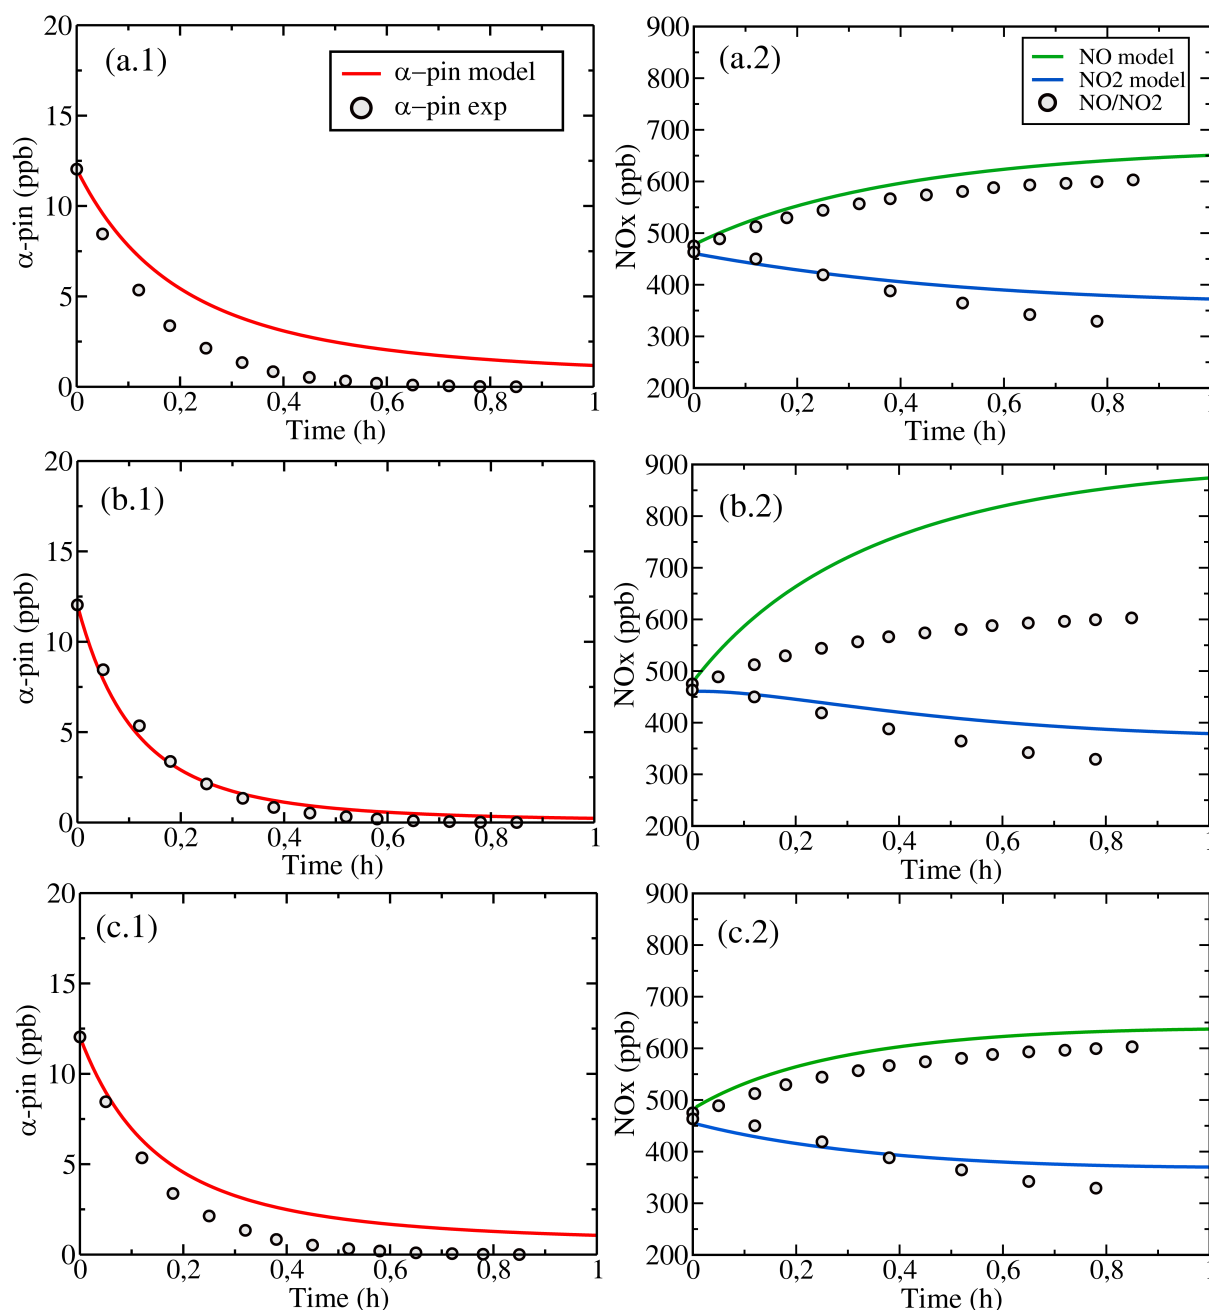

Figure S 2 – Figures show time evolution of  $\alpha$ -pinene and  $\text{NO}_x$  in the high- $\text{NO}_x$  experiment. Dots and lines represent measured and modelled compounds respectively. Modelled results are obtained with JR/MY scheme. Figures *a* show results of simulation obtained using 300 ppb of initial HONO concentration. This is the estimated value required to adjust the initial OH concentration retrieved from the initial  $\alpha$ -pinene decay. This simulation highlights a missing OH source as seen from the underestimation of the simulated  $\alpha$ -pinene decay. Figure *b* shows results obtained using an initial concentration of HONO of 800 ppb. This initial HONO concentration leads to a fair representation of the  $\alpha$ -pinene decay but overestimates the  $\text{NO}_x$  concentrations. Figure *c* shows results obtained using the MCM organic scheme (Saunders et al., 2003) with an initial concentration of HONO of 300 ppb. A similar disagreement is observed in the  $\alpha$ -pinene decay. Note that including the typical Teflon wall chamber reactions described by Metzger et al. (2008) does not reconcile the simulated and observed concentration. In the context of this smog chamber experiment, these reactions were found to be negligible. An extra OH source was therefore added for this experiment as described in the text.

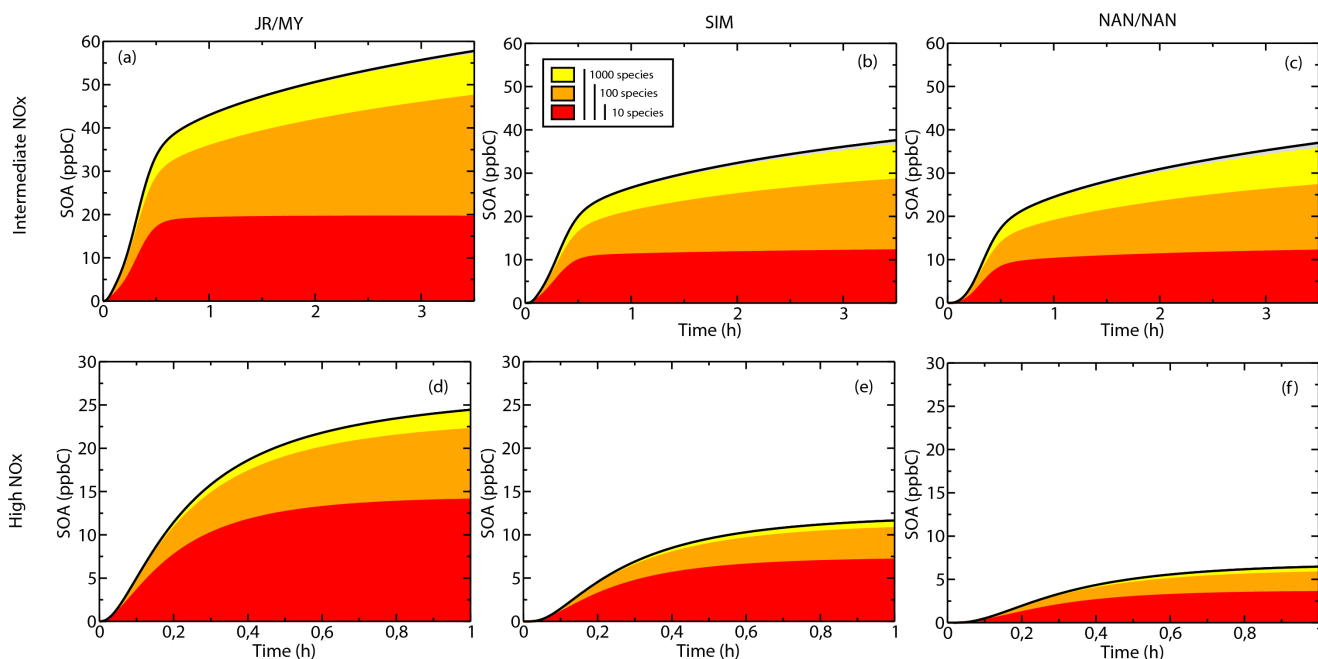

Figure S 3 – Contribution of the top 10 (red), top 100 (red+orange) and top 1000 (red+orange+yellow) organic species to the total simulated SOA mass for the intermediate- $\text{NO}_x$  experiment obtained with JR/MY (a), SIM (b) and NAN/NAN (c) and for the high- $\text{NO}_x$  experiment obtained with JR/MY (d), SIM (e) and NAN/NAN (f).

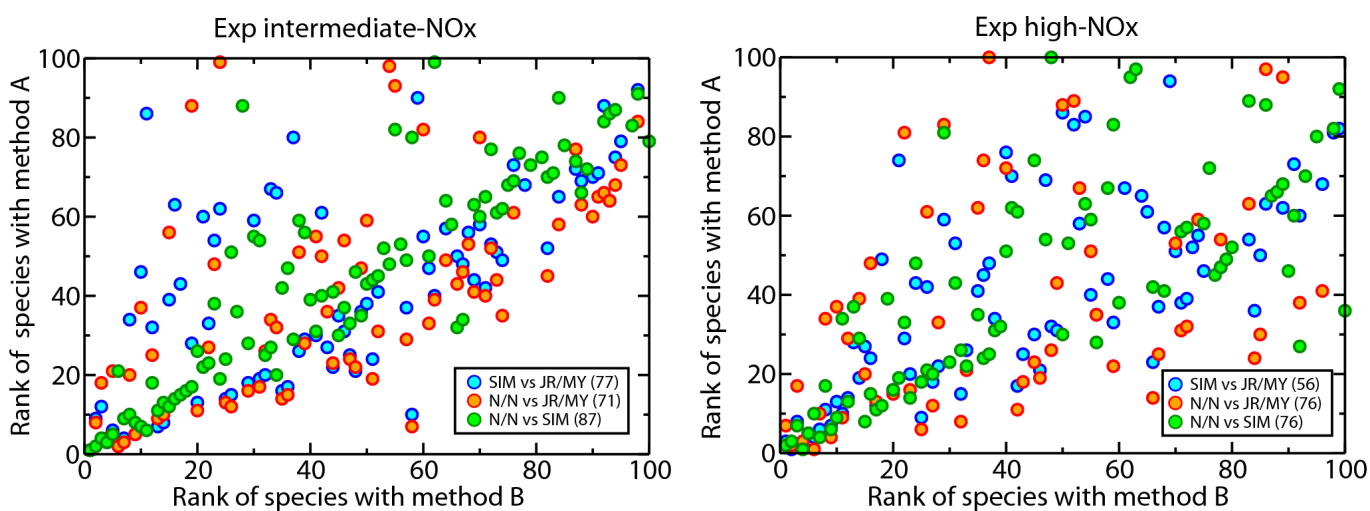

Figure S 4 – Comparisons of the ranks of the simulated top 100 organic species between the various methods in the intermediate and high- $\text{NO}_x$  experiments.

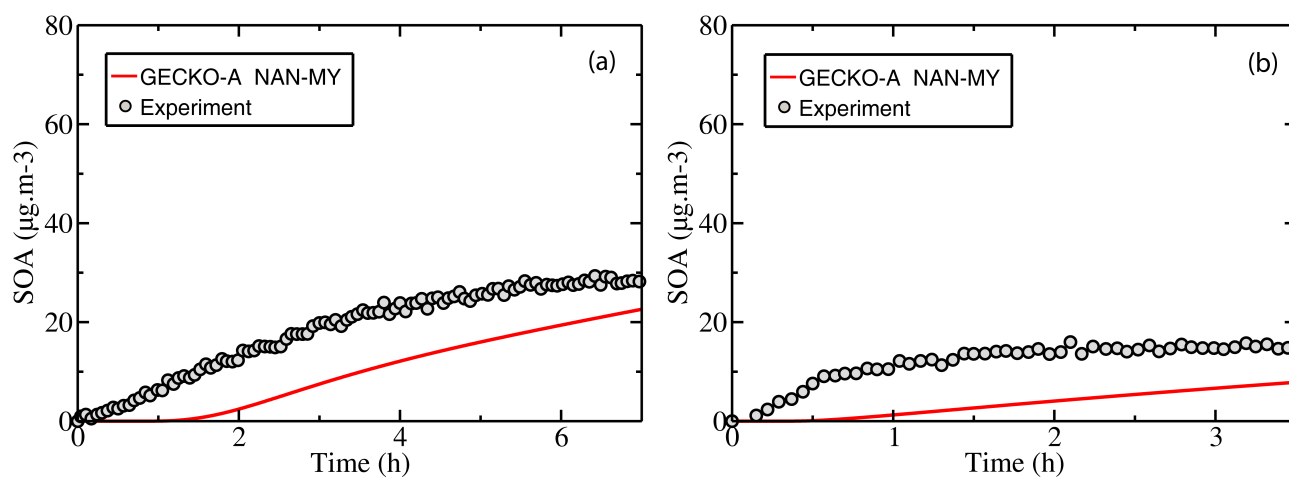

Figure S 5 – Comparisons of observed and simulated SOA in the (a) low- and (b) intermediate- $\text{NO}_x$  experiments. Boiling points of organics are estimated with the Nannoolal et al. method (2004) and vapour pressure are estimated with the Myrdal and Yalkowsky method (1997). No SOA is simulated with this method in the high- $\text{NO}_x$  experiment.

Table S1 : Top 10 species in simulated SOA with SIM in the intermediate-NO<sub>x</sub> experiment, with their rank, contribution to the total simulated SOA mass, vapour pressure and fraction in condensed phase (taken at the end of the experiment).

|         |                               |        |        |        |        |        |
|---------|-------------------------------|--------|--------|--------|--------|--------|
|         |                               |        |        |        |        |        |
| SIM     | rank                          | 1      | 2      | 3      | 4      | 5      |
|         | contrib                       | 9%     | 5%     | 4%     | 4%     | 4%     |
|         | log(P <sup>vap</sup> )        | -9,97  | -9,91  | -8,98  | -9,24  | -9,85  |
|         | ξ <sub>i</sub> <sup>aer</sup> | 0,98   | 0,98   | 0,85   | 0,91   | 0,97   |
| JR/MY   | rank                          | 1      | 6      | 4      | 7      | 9      |
|         | contrib                       | 6%     | 4%     | 5%     | 3%     | 3%     |
|         | log(P <sup>vap</sup> )        | -12,16 | -11,28 | -10,32 | -10,79 | -11,71 |
|         | ξ <sub>i</sub> <sup>aer</sup> | 0,99   | 0,99   | 0,99   | 0,99   | 0,99   |
| NAN/NAN | rank                          | 1      | 2      | 4      | 3      | 5      |
|         | contrib                       | 8%     | 6%     | 3%     | 5%     | 3%     |
|         | log(P <sup>vap</sup> )        | -9,32  | -9,81  | -8,67  | -9,45  | -9,07  |
|         | ξ <sub>i</sub> <sup>aer</sup> | 0,93   | 0,98   | 0,74   | 0,96   | 0,88   |
|         |                               |        |        |        |        |        |
| SIM     | rank                          | 6      | 7      | 8      | 9      | 10     |
|         | contrib                       | 3%     | 2%     | 2%     | 2%     | 2%     |
|         | log(P <sup>vap</sup> )        | -8,98  | -9,20  | -9,20  | -7,94  | -9,98  |
|         | ξ <sub>i</sub> <sup>aer</sup> | 0,85   | 0,90   | 0,90   | 0,32   | 0,98   |
| JR/MY   | rank                          | 5      | 13     | 14     | 2      | 58     |
|         | contrib                       | 4%     | 1%     | 1%     | 5%     | < 1%   |
|         | log(P <sup>vap</sup> )        | -10,10 | -10,42 | -10,42 | -9,37  | -12,63 |
|         | ξ <sub>i</sub> <sup>aer</sup> | 0,99   | 0,99   | 0,99   | 0,96   | 1,00   |
| NAN/NAN | rank                          | 21     | 9      | 10     | 8      | 7      |
|         | contrib                       | 1%     | 2%     | 2%     | 3%     | 3%     |
|         | log(P <sup>vap</sup> )        | -8,39  | -8,92  | -8,92  | -7,92  | -9,76  |
|         | ξ <sub>i</sub> <sup>aer</sup> | 0,60   | 0,87   | 0,87   | 0,40   | 0,97   |

Table S2 : Top 10 species in simulated SOA with SIM in the high-NO<sub>x</sub> experiment, with their rank, contribution to the total simulated SOA mass, vapour pressure and fraction in condensed phase (taken at the end of the experiment).

|         |                               |                                                                                     |                                                                                     |                                                                                     |                                                                                       |                                                                                       |
|---------|-------------------------------|-------------------------------------------------------------------------------------|-------------------------------------------------------------------------------------|-------------------------------------------------------------------------------------|---------------------------------------------------------------------------------------|---------------------------------------------------------------------------------------|
|         |                               | 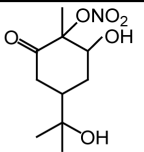   |    |    |    |    |
| SIM     | rank                          | 1                                                                                   | 2                                                                                   | 3                                                                                   | 4                                                                                     | 5                                                                                     |
|         | contrib                       | 15%                                                                                 | 13%                                                                                 | 10%                                                                                 | 7%                                                                                    | 5%                                                                                    |
|         | log(P <sup>vap</sup> )        | -9,85                                                                               | -9,97                                                                               | -8,98                                                                               | -11,09                                                                                | -9,41                                                                                 |
|         | ξ <sub>i</sub> <sup>aer</sup> | 0,89                                                                                | 0,92                                                                                | 0,54                                                                                | 0,99                                                                                  | 0,75                                                                                  |
| JR/MY   | rank                          | 2                                                                                   | 4                                                                                   | 1                                                                                   | 6                                                                                     | 5                                                                                     |
|         | contrib                       | 10%                                                                                 | 9%                                                                                  | 16%                                                                                 | 4%                                                                                    | 4%                                                                                    |
|         | log(P <sup>vap</sup> )        | -11,71                                                                              | -12,16                                                                              | -10,10                                                                              | -12,83                                                                                | -10,84                                                                                |
|         | ξ <sub>i</sub> <sup>aer</sup> | 0,99                                                                                | 0,99                                                                                | 0,97                                                                                | 0,99                                                                                  | 0,99                                                                                  |
| NAN/NAN | rank                          | 2                                                                                   | 3                                                                                   | 7                                                                                   | 1                                                                                     | 5                                                                                     |
|         | contrib                       | 11%                                                                                 | 10%                                                                                 | 4%                                                                                  | 12%                                                                                   | 4%                                                                                    |
|         | log(P <sup>vap</sup> )        | -9,07                                                                               | -9,32                                                                               | -8,39                                                                               | -10,60                                                                                | -8,90                                                                                 |
|         | ξ <sub>i</sub> <sup>aer</sup> | 0,44                                                                                | 0,59                                                                                | 0,15                                                                                | 0,96                                                                                  | 0,36                                                                                  |
|         |                               |  |  |  |  |  |
| SIM     | rank                          | 6                                                                                   | 7                                                                                   | 8                                                                                   | 9                                                                                     | 10                                                                                    |
|         | contrib                       | 4%                                                                                  | 4%                                                                                  | 2%                                                                                  | 2%                                                                                    | 2%                                                                                    |
|         | log(P <sup>vap</sup> )        | -9,85                                                                               | -11,09                                                                              | -8,17                                                                               | -9,98                                                                                 | -9,86                                                                                 |
|         | ξ <sub>i</sub> <sup>aer</sup> | 0,89                                                                                | 0,99                                                                                | 0,15                                                                                | 0,92                                                                                  | 0,88                                                                                  |
| JR/MY   | rank                          | 7                                                                                   | 9                                                                                   | 3                                                                                   | 25                                                                                    | 11                                                                                    |
|         | contrib                       | 2%                                                                                  | 2%                                                                                  | 10%                                                                                 | 1%                                                                                    | 2%                                                                                    |
|         | log(P <sup>vap</sup> )        | -11,71                                                                              | -12,83                                                                              | -9,26                                                                               | -12,63                                                                                | -12,11                                                                                |
|         | ξ <sub>i</sub> <sup>aer</sup> | 0,99                                                                                | 0,99                                                                                | 0,80                                                                                | 0,99                                                                                  | 0,99                                                                                  |
| NAN/NAN | rank                          | 10                                                                                  | 4                                                                                   | 17                                                                                  | 6                                                                                     | 9                                                                                     |
|         | contrib                       | 2%                                                                                  | 6%                                                                                  | 1%                                                                                  | 4%                                                                                    | 2%                                                                                    |
|         | log(P <sup>vap</sup> )        | -8,85                                                                               | -10,37                                                                              | -7,80                                                                               | -9,76                                                                                 | -9,37                                                                                 |
|         | ξ <sub>i</sub> <sup>aer</sup> | 0,32                                                                                | 0,94                                                                                | 0,04                                                                                | 0,8                                                                                   | 0,61                                                                                  |
